# Supplementary material for: Occurrence and exposure assessment of perchlorate, iodide and nitrate ions from dairy milk and water in Japan and Sri Lanka
Source: Royal Society of Chemistry journal article supplement (doi:10.1039/c1em10327j), 2011-01-01
Supplement: supplementarymaterialsrev.pdf [file supplementarymaterialsrev.pdf]

**SUPPLEMENTARY MATERIALS**

**Occurrence and exposure assessment of perchlorate, iodide and nitrate ions  
from dairy milk and water in Japan and Sri Lanka**

Keerthi S. Guruge<sup>a,\*</sup>, Qian Wu<sup>b</sup>, Kurunthachalam Kannan<sup>b,\*\*</sup>

<sup>a</sup> *Safety Research Team, National Institute of Animal Health, National Agriculture and Food  
Research Organization,*

*3-1-5 Kannondai, Tsukuba, Ibaraki 305-0856, Japan*

<sup>b</sup> *Wadsworth Center, New York State Department of Health, and Department of Environmental  
Health Sciences, School of Public Health, State University of New York at Albany, Empire State  
Plaza, P. O. Box 509, Albany, New York 12201-0509, USA*

Corresponding author

\*K. S. Guruge: Tel: +81-298-387822; Fax: +81-8387825; guruge@affrc.go.jp

\*\*K. Kannan: Tel: +1-518-474-0015; Fax: +1-518-473-2895; e-mail: kkannan@wadsworth.org



Supplementary Table 1: Details of milk samples collected from Japan and Sri Lanka

| Country  | Area                | Container type, and size | Fat content % <sup>a</sup> |                    |
|----------|---------------------|--------------------------|----------------------------|--------------------|
| Japan    | Hokkaido            | Paper pack, 1000 ml      | >3.7, non-adjusted         |                    |
|          |                     | Paper pack, 1000 ml      | >3.7, non-adjusted         |                    |
|          |                     | Paper pack, 200 ml       | >3.7, non-adjusted         |                    |
|          |                     | Paper pack, 300 ml       | >3.7, non-adjusted         |                    |
|          |                     | Paper pack, 200ml        | >3.7, non-adjusted         |                    |
|          |                     | Paper pack, 250 ml       | >3.7, non-adjusted         |                    |
|          |                     | Paper pack, 500 ml       | >3.7, non-adjusted         |                    |
|          |                     | Paper pack, 500 ml       | >4, non-adjusted           |                    |
|          |                     | Paper pack, 200 ml       | >3.9, non-adjusted         |                    |
|          | Akita               | Bottle, 500 ml           | >3.6, non-adjusted         |                    |
|          | Iwate               | Paper pack, 500 ml       | <0.1, adjusted             |                    |
|          |                     | Paper pack, 500 ml       | >3.6, non-adjusted         |                    |
|          |                     | Paper pack, 1000 ml      | >3.6, non-adjusted         |                    |
|          |                     | Paper pack, 500 ml       | >3.6, non-adjusted         |                    |
|          |                     | Paper pack, 500 ml       | >3.5, non-adjusted         |                    |
|          |                     | Paper pack, 500 ml       | >3.7, non-adjusted         |                    |
|          |                     | Paper pack, 500 ml       | >3.6, non-adjusted         |                    |
|          |                     | Paper pack, 500 ml       | >3.3, non-adjusted         |                    |
|          |                     | Fukushima                | Paper pack, 250 ml         | >3.6, non-adjusted |
|          |                     |                          | Paper pack, 500 ml         | >3.6, non-adjusted |
|          | Paper pack, 250 ml  |                          | >3.7, non-adjusted         |                    |
|          | Tochigi             | Paper pack, 1000 ml      | >3.6, non-adjusted         |                    |
|          |                     | Paper pack, 1000 ml      | >3.6, non-adjusted         |                    |
|          | Ibaraki             | Paper pack, 1000 ml      | >3.5, non-adjusted         |                    |
|          |                     | Paper pack, 1000 ml      | >3.5, non-adjusted         |                    |
|          |                     | Paper pack, 1000 ml      | >3.6, non-adjusted         |                    |
|          |                     | Paper pack, 1000 ml      | >3.6, non-adjusted         |                    |
|          | Chiba               | Paper pack, 1000 ml      | >3.5, non-adjusted         |                    |
|          |                     | Paper pack, 1000 ml      | 2.5, adjusted              |                    |
|          |                     | Paper pack, 1000 ml      | >3.6, non-adjusted         |                    |
|          |                     | Paper pack, 1000 ml      | >4.4, adjusted             |                    |
|          |                     | Paper pack, 1000 ml      | >3.6, non-adjusted         |                    |
|          | Saitama             | Paper pack, 1000 ml      | 1, adjusted                |                    |
| Tokyo    | Paper pack, 1000 ml | 1.5, adjusted            |                            |                    |
|          | Paper pack, 1000 ml | >4.4, adjusted           |                            |                    |
| Kanagawa | Paper pack, 1000 ml | 3, adjusted              |                            |                    |
|          | Paper pack, 1000 ml | >3.5, non-adjusted       |                            |                    |
|          | Paper pack, 1000 ml | >3.5, non-adjusted       |                            |                    |
| Shizuoka | Paper pack, 1000 ml | >3.7, non-adjusted       |                            |                    |
|          | Paper pack, 1000 ml | >3.7, non-adjusted       |                            |                    |
| Aichi    | Paper pack, 250 ml  | >3.7, non-adjusted       |                            |                    |
| Kumamoto | Paper pack, 200 ml  | >4.4, adjusted           |                            |                    |
|          | Paper pack, 250 ml  | 3, adjusted              |                            |                    |
| Miyazaki | Paper pack, 1000 ml | 2.5, adjusted            |                            |                    |

Continue: Supplementary Table 1:

| Country   | Area         | Container type, and size     | Fat content % <sup>a</sup> |
|-----------|--------------|------------------------------|----------------------------|
| Sri Lanka | Nuwara Eliya | Raw milk-1                   | non-adjusted               |
|           |              | Raw milk-2                   | non-adjusted               |
|           |              | Raw milk-3                   | non-adjusted               |
|           |              | Raw milk-4                   | non-adjusted               |
|           |              | Raw milk-5                   | non-adjusted               |
|           |              | Powder milk-local, 400g      | Full cream                 |
|           |              | Powder milk-imported-1, 400g | Full cream                 |
|           |              | Powder milk-imported-2, 400g | Full cream                 |
|           |              | Paper pack, 1000 ml          | Full cream                 |
|           |              | Paper pack, 1000 ml          | Full cream                 |
|           |              | Paper pack, 1000 ml          | Full cream                 |

<sup>a</sup> Details of fat content were given by the producers

Supplementary Table 2: Details of water samples collected from Japan and Sri Lanka

| Country      | Area      | Type          | Sample no    |           |
|--------------|-----------|---------------|--------------|-----------|
| Japan        | Iwate     | Tap water     | 5            |           |
|              |           | Well water    | 1            |           |
|              |           | Well water    | 3            |           |
|              | Ibaraki   | Tap water     | 6            |           |
|              |           | Well water    | 3            |           |
|              | Kanagawa  | Tap water     | 9            |           |
|              |           |               | <b>Total</b> | <b>27</b> |
|              | Sri Lanka | Badulla       | Tap water    | 2         |
|              |           | Colombo       | Tap water    | 4         |
|              |           |               | Well water   | 1         |
| Galle        |           | Tap water     | 3            |           |
|              |           | Well water    | 2            |           |
| Kalutara     |           | Tap water     | 1            |           |
|              |           | Surface water | 2            |           |
| Kandy        |           | Tap water     | 2            |           |
|              |           | Surface water | 1            |           |
| Kegolle      |           | Tap water     | 2            |           |
| Nuwara Eliya |           | Tap water     | 3            |           |
|              |           | Well water    | 3            |           |
|              |           | Surface water | 1            |           |
|              |           | <b>Total</b>  | <b>27</b>    |           |
